# Supplementary material for: The Theoretical Model of Decision-Making Behaviour Geospatial Analysis Using Data Obtained from the Games of Chess
Source: MDPI journal article supplement (doi:10.3390/ijerph191912353), 2022-09-28
Supplement: s1 [file s1]

## Supplementary

### Cofiguration of possible combination of information - examples

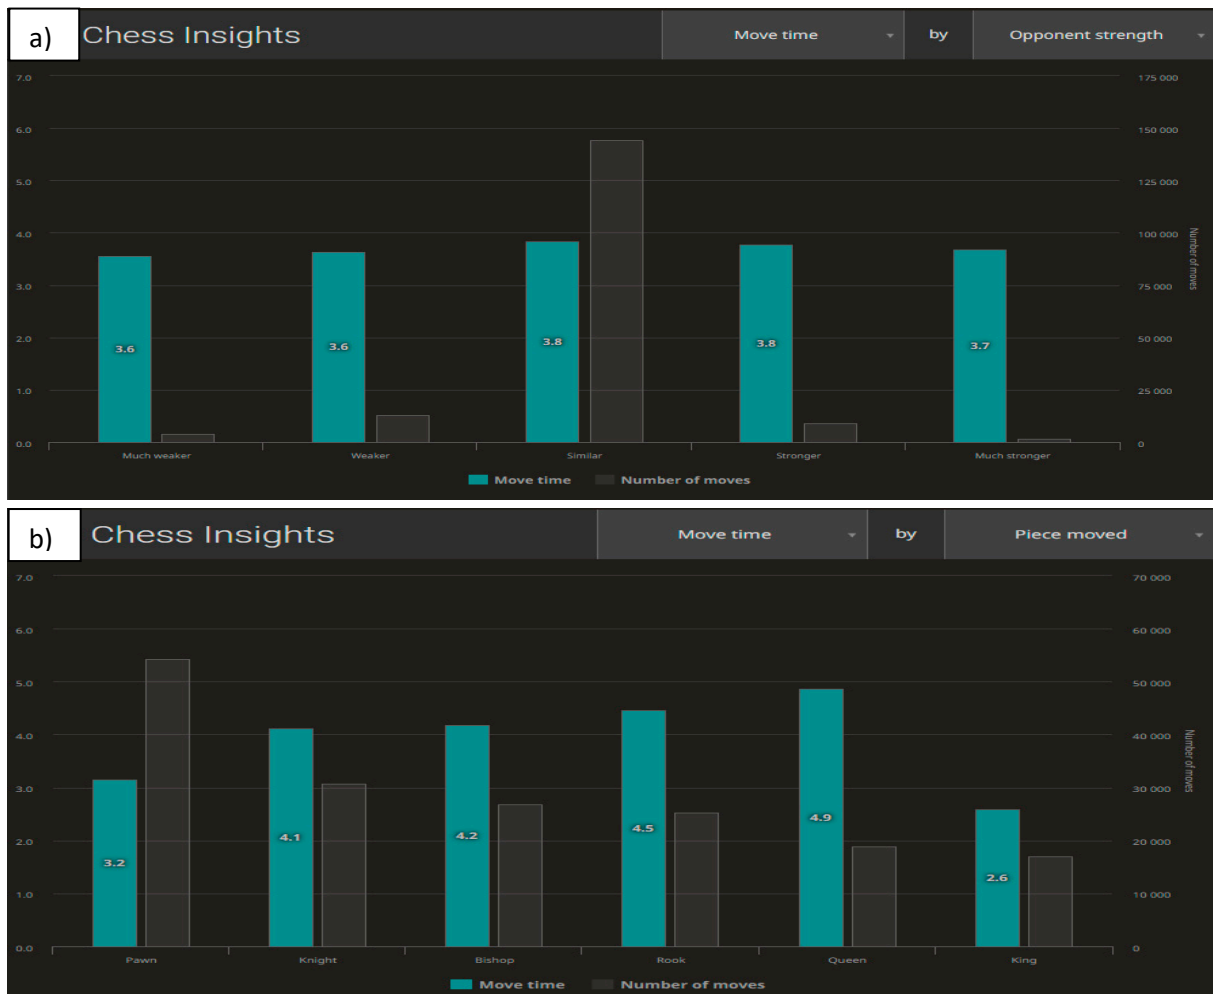

**Figure S1.** Correlation of the time spent per move taking into account the strength of the opponents - a) and the average time spent making a move with an individual piece - b). Source: lichess.org

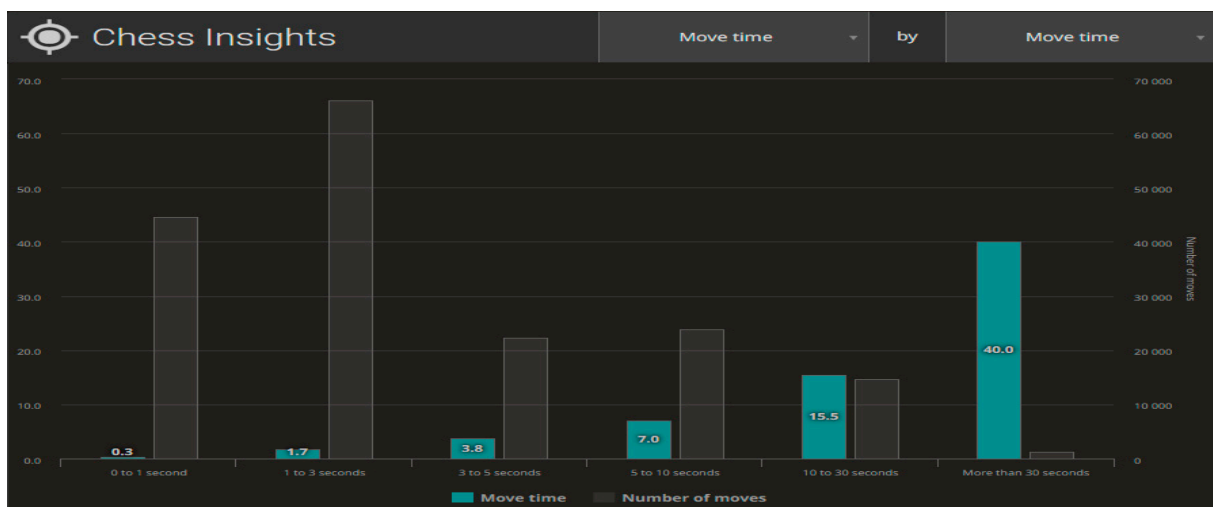

**Figure S2.** Statistics concerning the number of moves in each time slot. Source: lichess.org

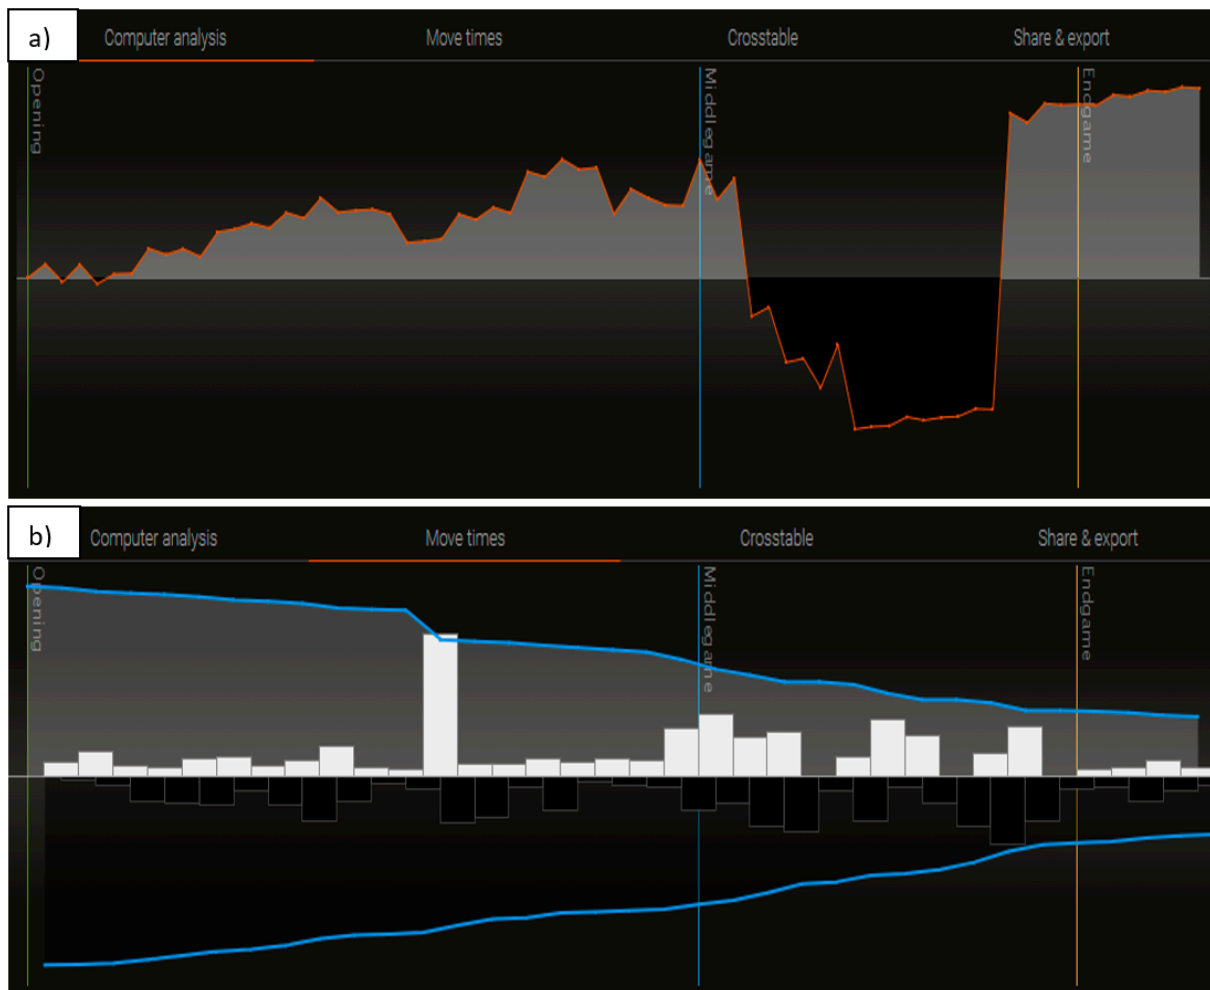

**Figure S3.** The analysis of a single game using the chess engine - a) and the statistical analysis that takes into account the time spent per move - b). Source: lichess.org

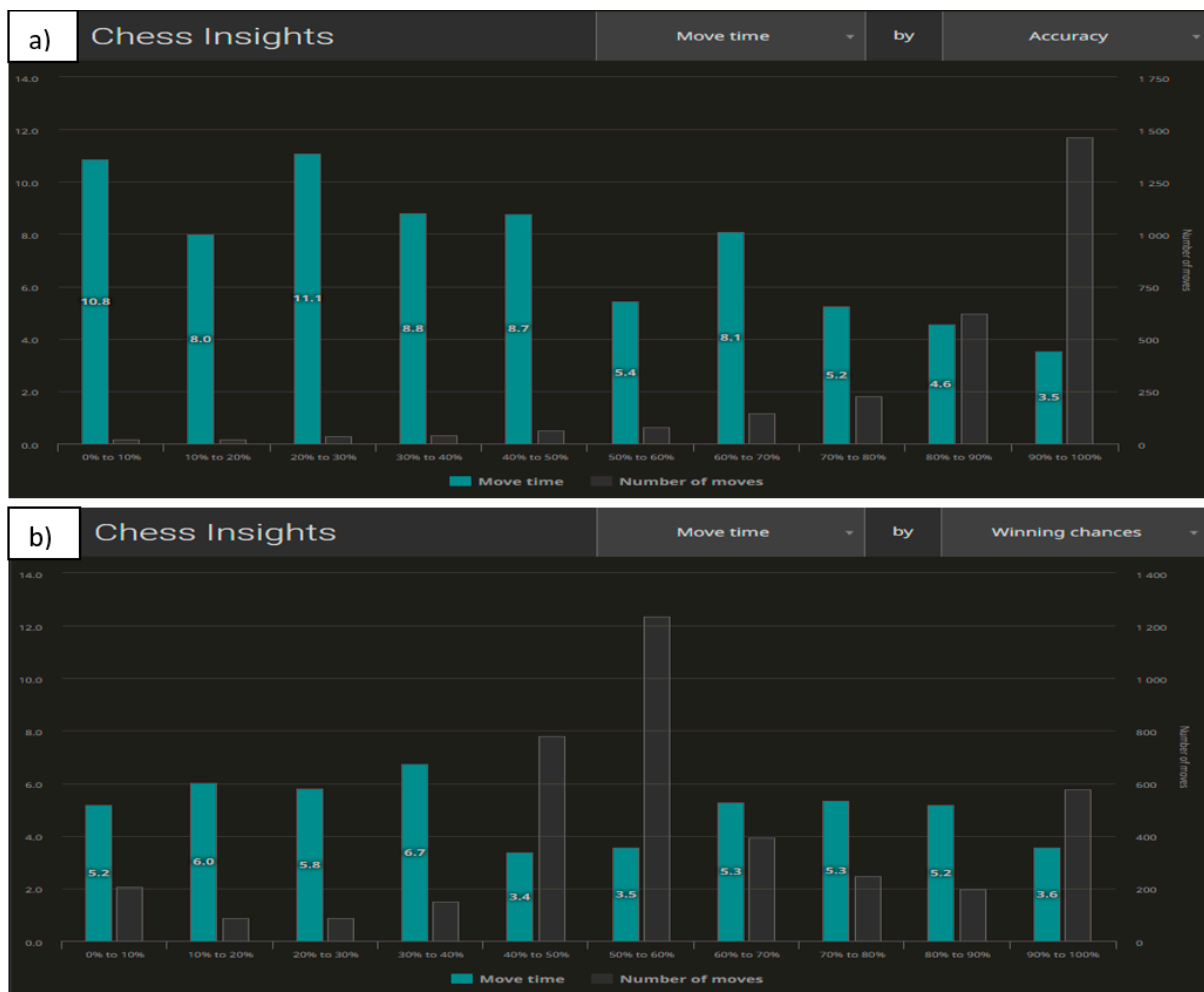

**Figure S4.** Evaluation of the quality of the decisions made, with regard to the average time per move - a), and evaluation of the chances of winning in relation to the time spent per move - b). Source: lichess.org

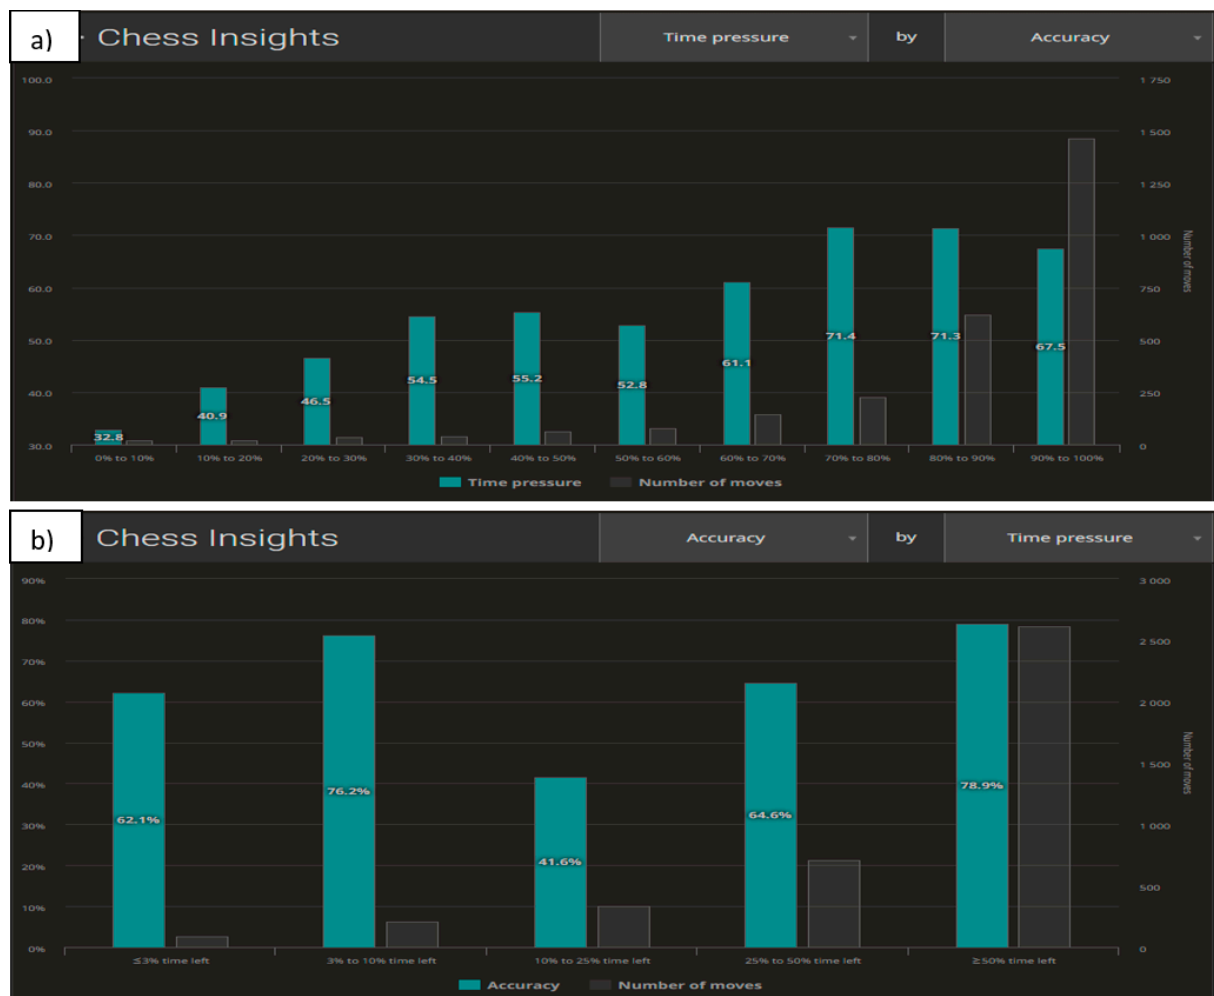

**Figure S5.** Correlation of time pressure and accuracy of decision making (against chess engine evaluation) - a) and overview showing accuracy with time pressure taken into account - b). Source: lichess.org

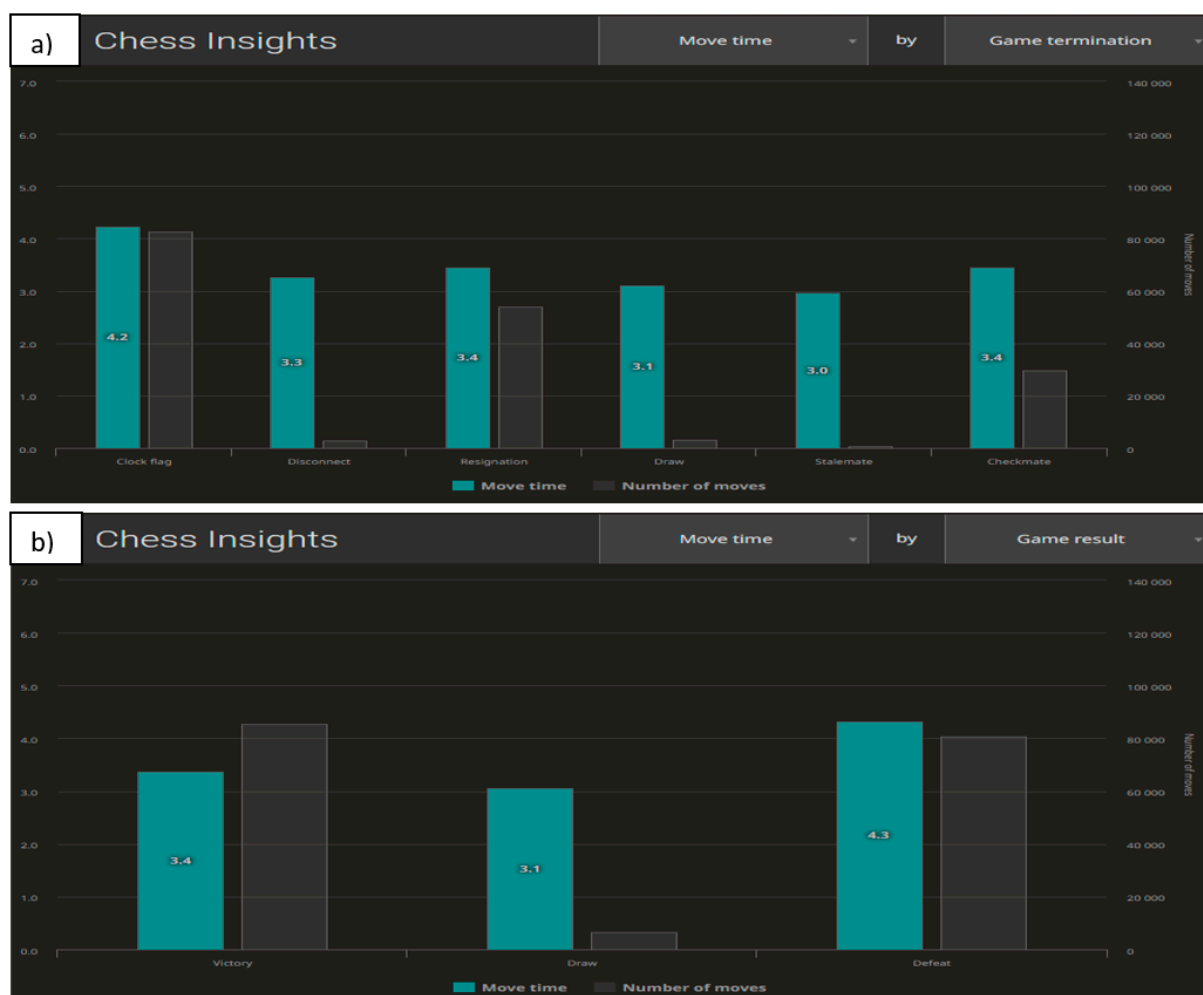

**Figure S6.** Game termination type statistics - a) and game result statistics - b). Source: lichess.org

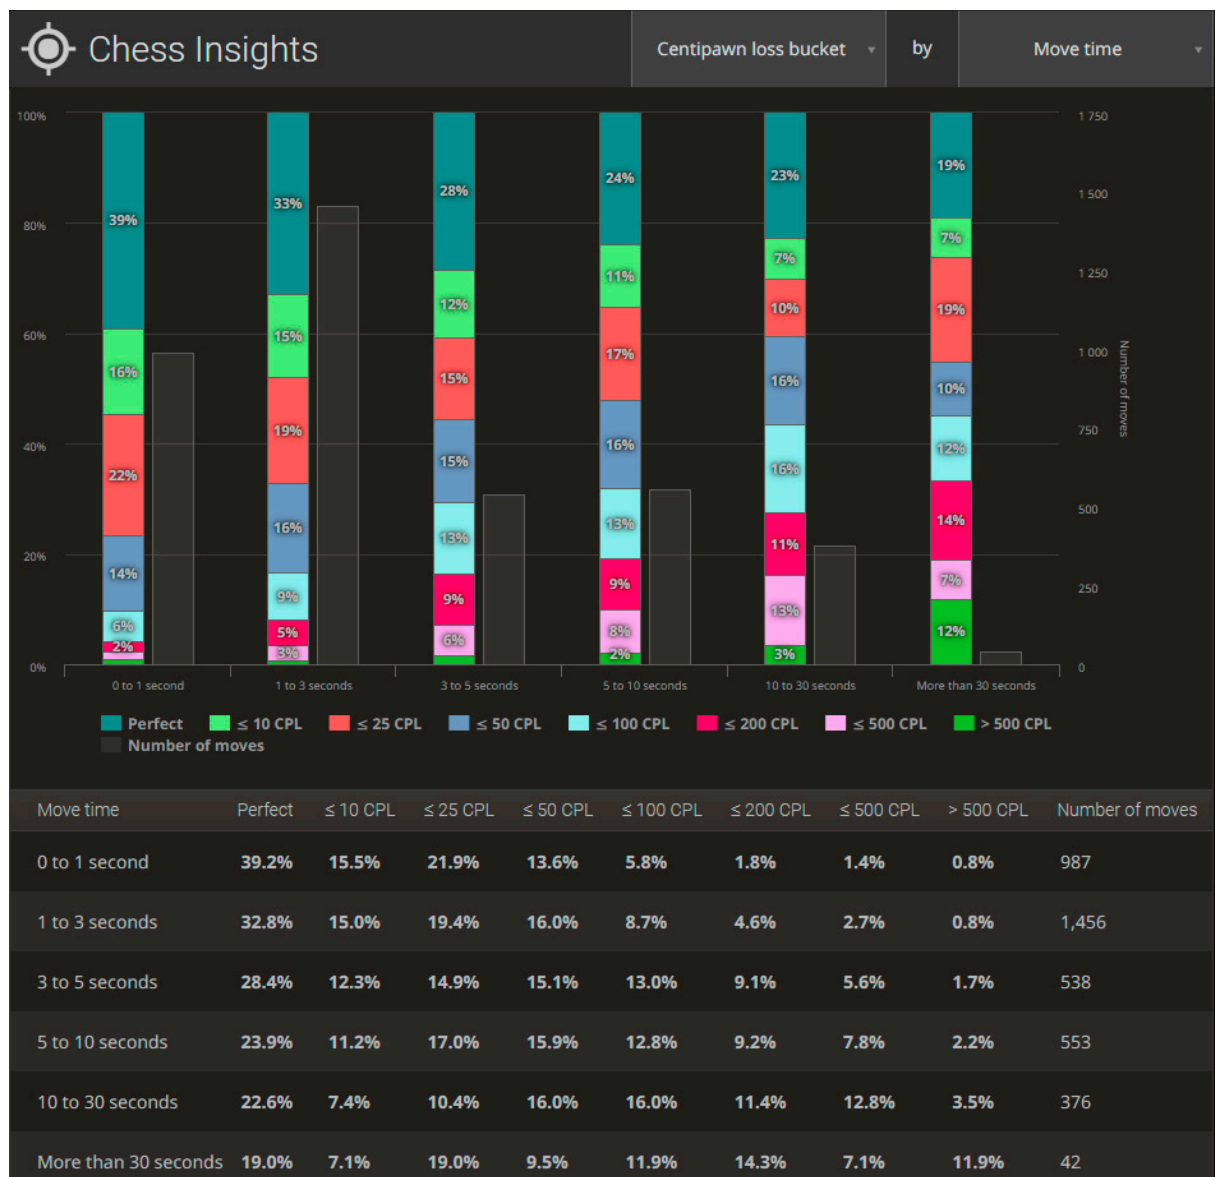

Figure S7. Correlations between Centipawn loss bucket and Move time. Source: lichess.org

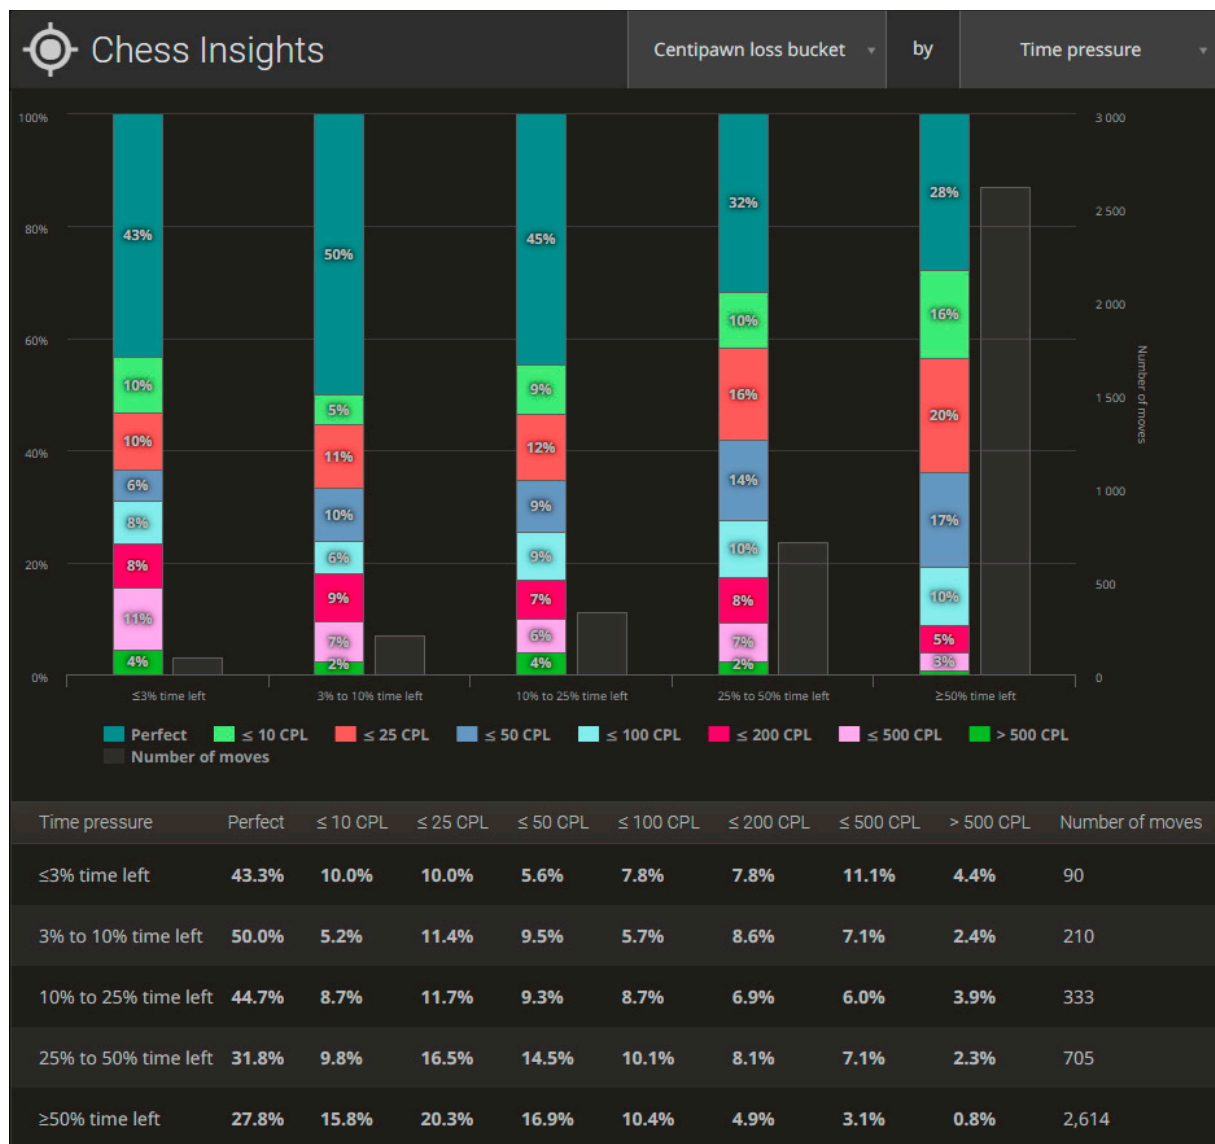

**Figure S8.** Correlations between Centipawn loss bucket and time pressure. Source: lichess.org

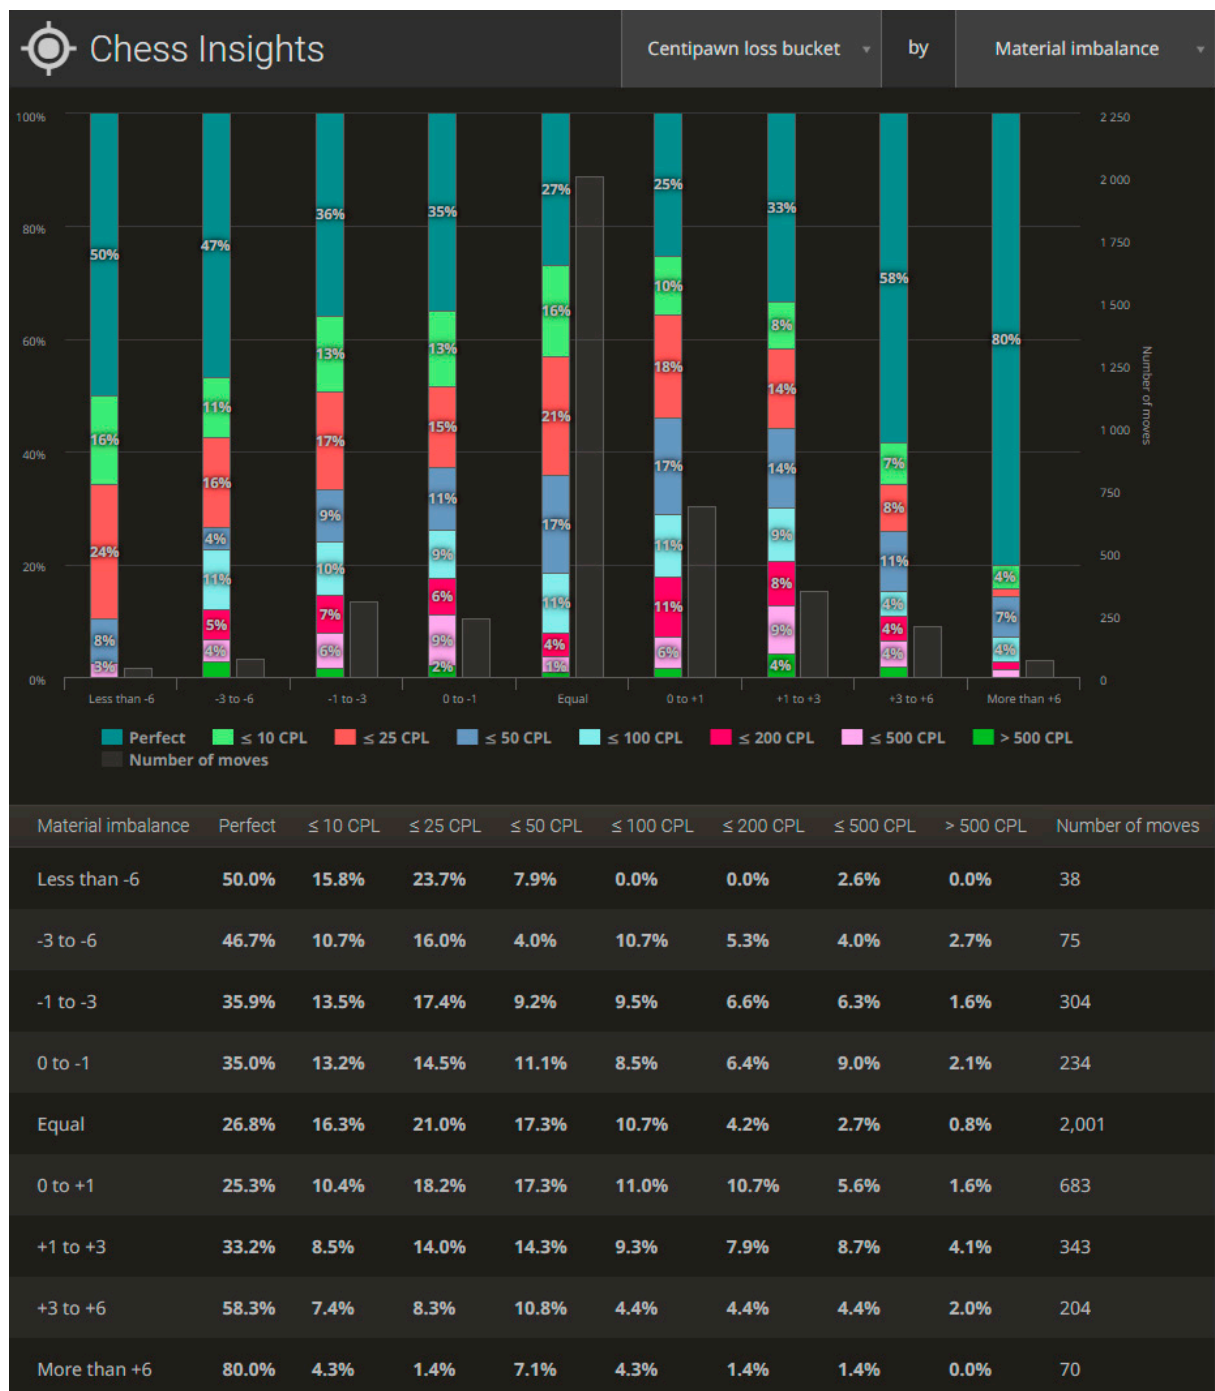

Figure S9. Correlations between Centipawn loss bucket and Material imbalance. Source: lichess.org



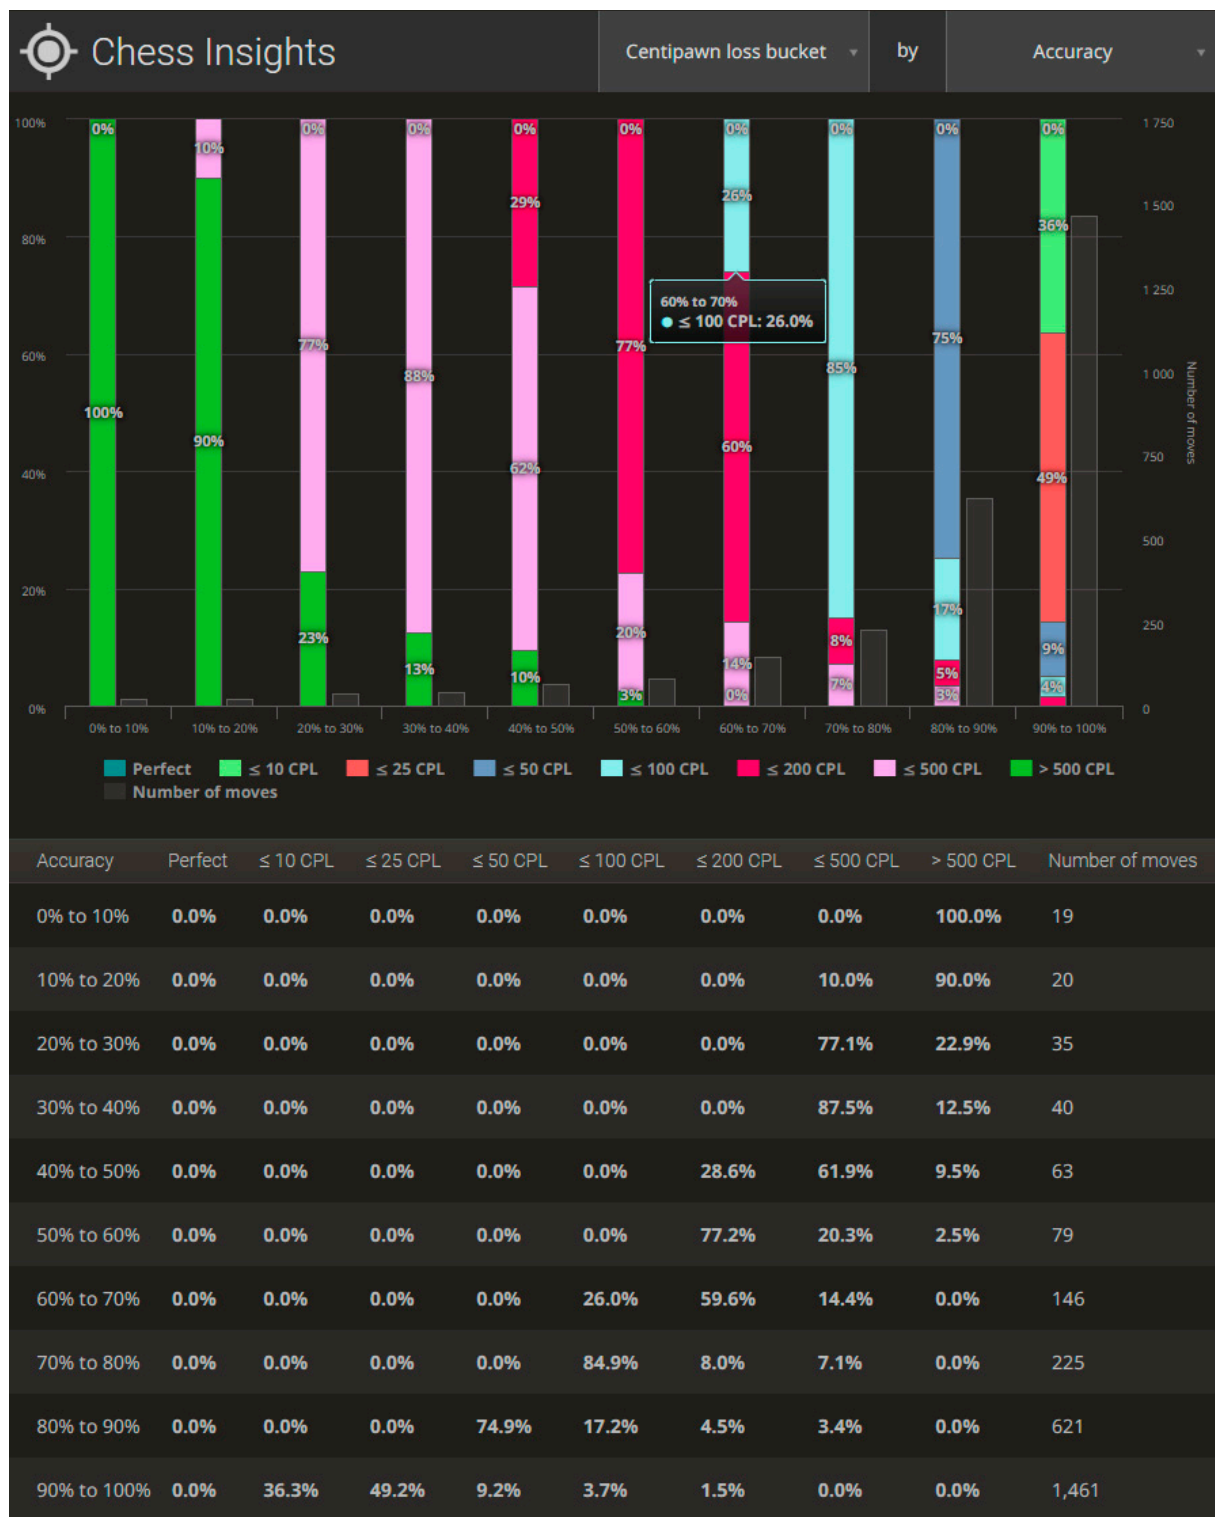

Figure S10. Correlations between Centipawn loss bucket and Accuracy. Source: lichess.org

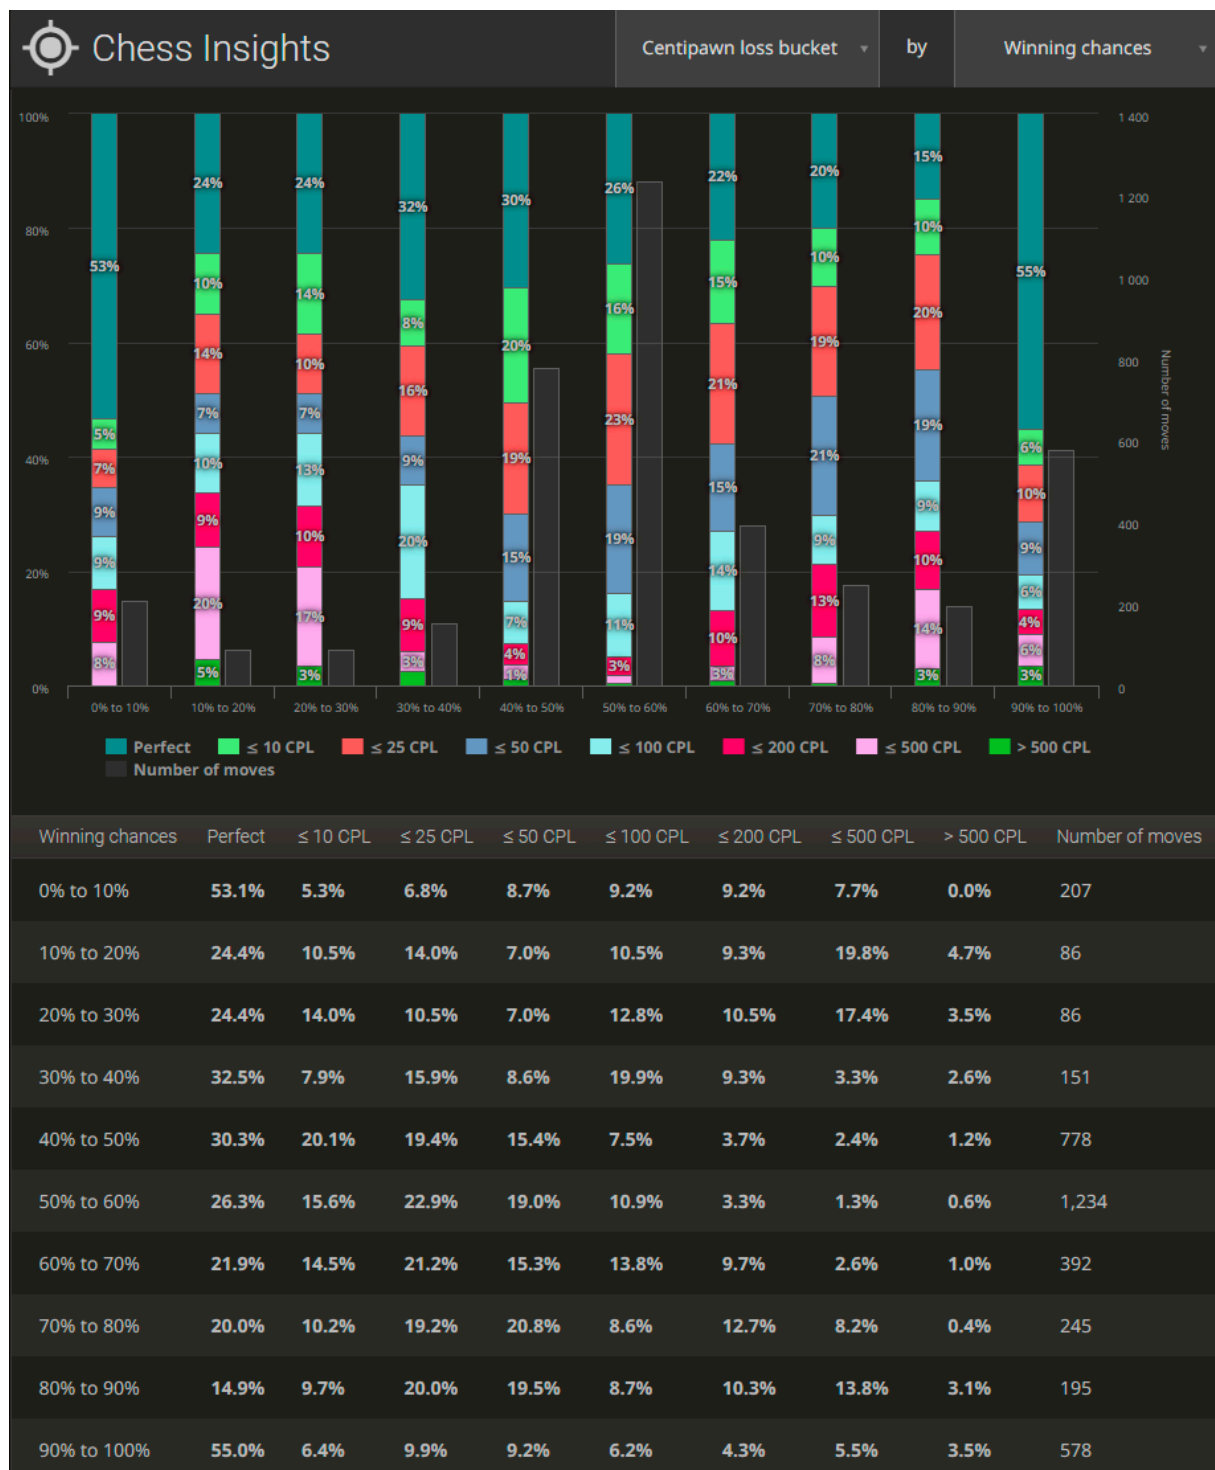

Figure S11. Correlations between Centipawn loss bucket and Winning chances. Source: lichess.org

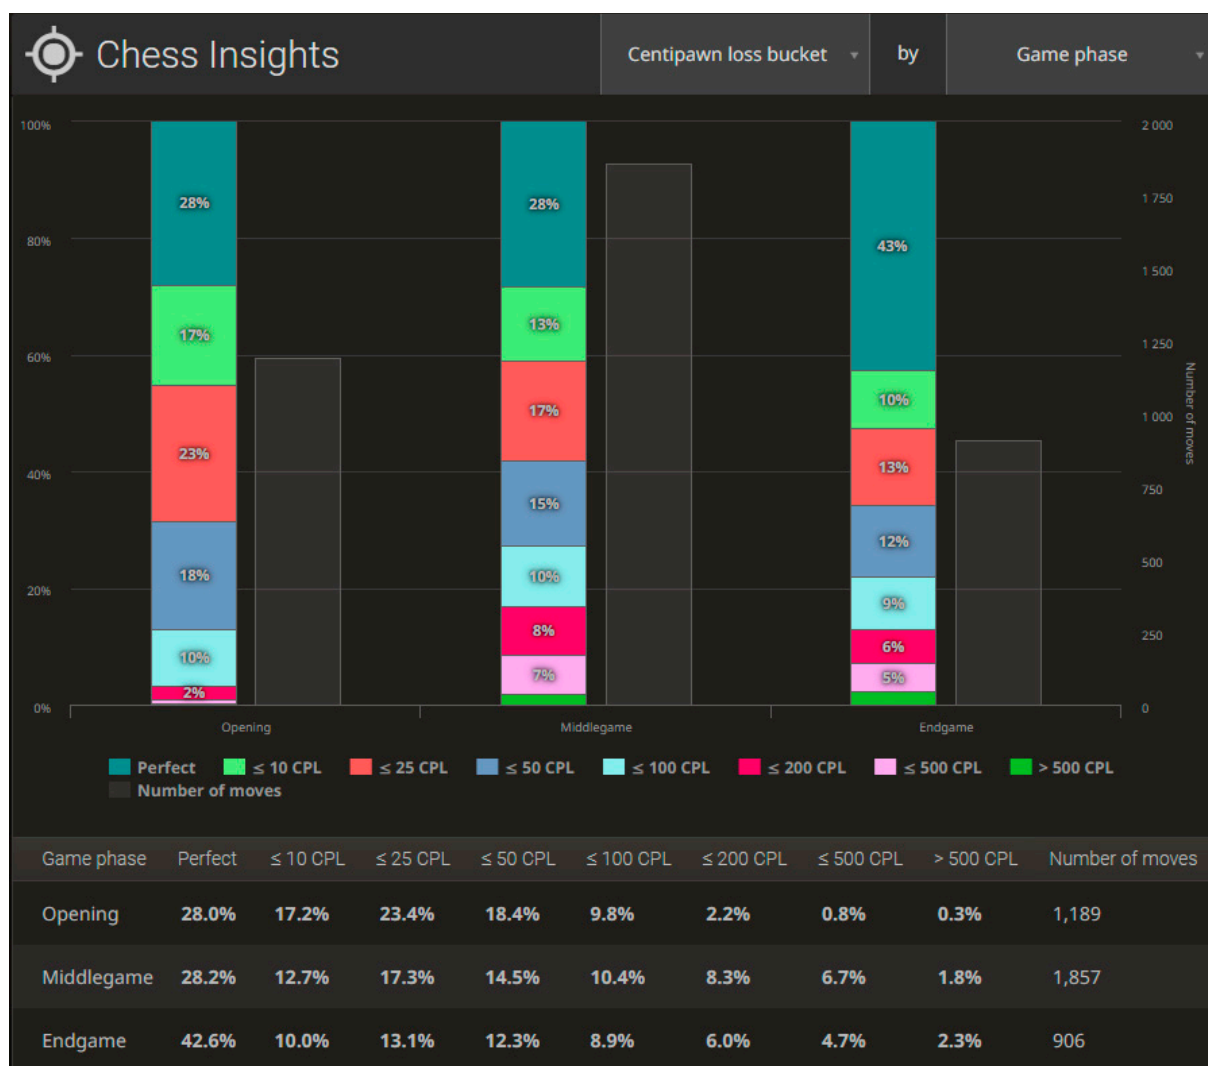

**Figure S12.** Correlations between Centipawn loss bucket and Game phase. Source: lichess.org
